# Supplementary material for: Raman scattering and photoluminescence investigation of YBO3:Eu3+ under high temperature and high pressure
Source: Royal Society of Chemistry journal article supplement (doi:10.1039/c4tc02061h), 2015-01-01
Supplement: c4tc02061h1.pdf [file c4tc02061h1.pdf]

**Results and discussion:**

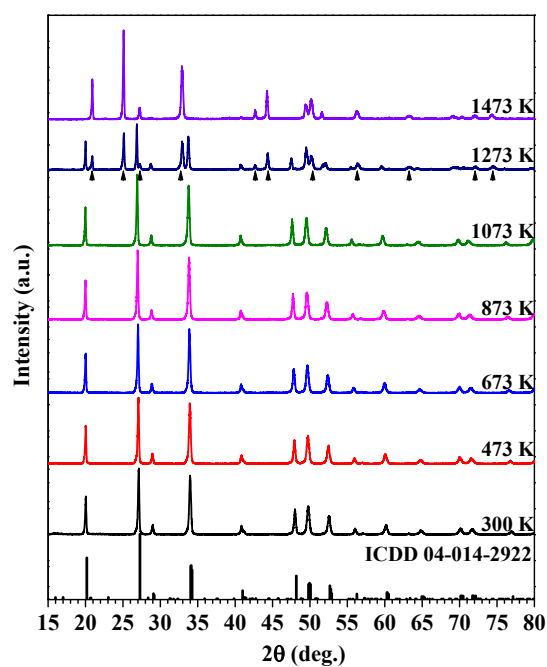

**Figure S1a Representative X-ray diffraction patterns of  $\text{YBO}_3:\text{Eu}^{3+}$  sample recorded at different temperatures during heating experiments**

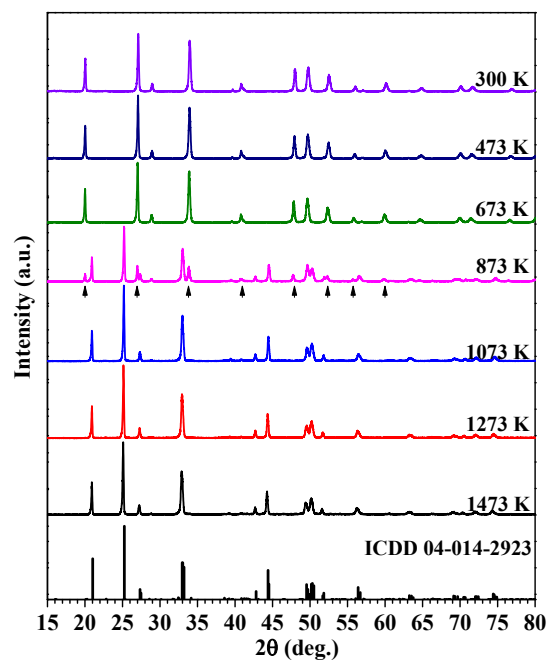

**Figure S1b Representative X-ray diffraction patterns of  $\text{YBO}_3:\text{Eu}^{3+}$  sample recorded at different temperatures during cooling experiments**

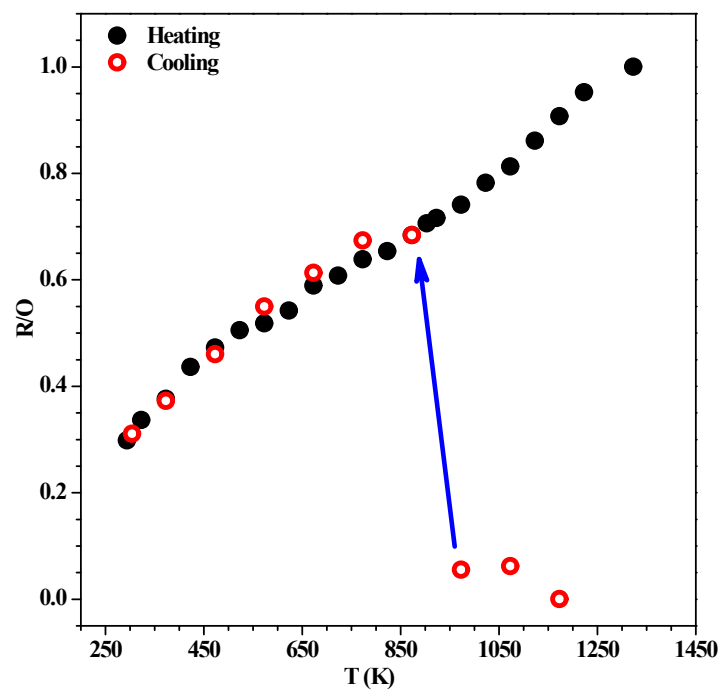

Figure S2 The intensity ratio  $R/O$  as a function of temperature.

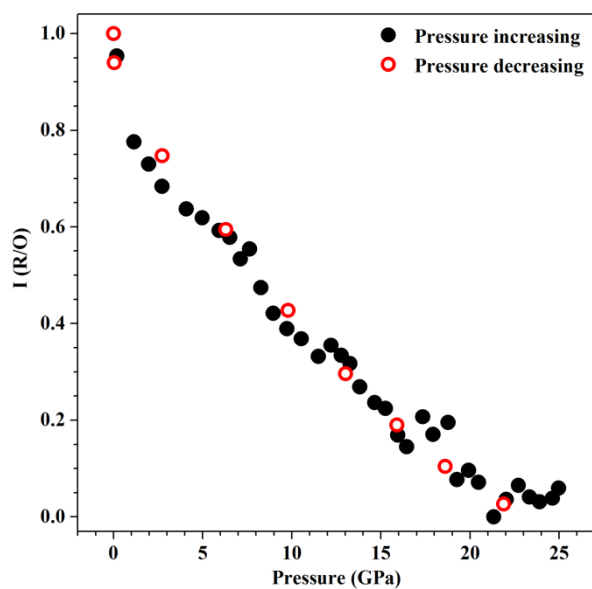

Figure S3 The intensity ratio  $R/O$  as a function of pressure.
